# Supplementary material
Source: PubMed Central journal article supplement (PMC5739999)
Supplement: NIHMS921432-supplement-Supp_Table.pdf [file NIHMS921432-supplement-Supp_Table.pdf]

| Ortholog Group                   | OG5_165036              | OG5_131021              | OG5_133717           | OG5_129101                  | OG5_137339                     | OG5_156754      | OG5_194975          | OG5_195812          | OG5_150032                | OG5_195806      | OG5_eten ETH_00036600 | No orthologs |        |       |                             |                               |
|----------------------------------|-------------------------|-------------------------|----------------------|-----------------------------|--------------------------------|-----------------|---------------------|---------------------|---------------------------|-----------------|-----------------------|--------------|--------|-------|-----------------------------|-------------------------------|
| Ave % Identity                   | 41.8                    | 37.7                    | 34.1                 | 34.1                        | 36.7                           | 40              | 59.7                | 71.3                | 32.8                      | 64.7            | N/A                   | N/A          |        |       |                             |                               |
|                                  | GeneID                  | Notes                   | GeneID               | Notes                       | GeneID                         | Notes           | GeneID              | Notes               | GeneID                    | Notes           | GeneID                | Notes        | GeneID | Notes | GeneID                      | Notes                         |
| <b>Toxoplasma</b>                |                         |                         |                      |                             |                                |                 |                     |                     |                           |                 |                       |              |        |       |                             |                               |
| <i>T. gondii</i> GT-1            | TgPL1: TgGT1_232600 SP  | TgPL2: TgGT1_231370 TM  | TgPL3: TgGT1_305140  | TgGT1_212130 DUF3336, 2 TM  | TgGT1_254420                   | TgGT1_273730    |                     |                     |                           |                 |                       |              |        |       |                             |                               |
| <i>T. gondii</i> ME49            | TgPL1: TgME49_232600 SP | TgPL2: TgME49_231370 TM | TgPL3: TgME49_305140 | TgME49_212130 DUF3336, 2 TM | TgME49_254420                  | TgME49_273730   |                     |                     |                           |                 |                       |              |        |       |                             |                               |
| <i>T. gondii</i> VEG             | TgPL1: TgVEG_232600 SP  | TgPL2: TgVEG_231370 TM  | TgPL3: TgVEG_305140  | TgVEG_212130 DUF3336, 2 TM  | TgVEG_254420                   | TgVEG_273730    |                     |                     |                           |                 |                       |              |        |       |                             |                               |
| <b>Plasmodium</b>                |                         |                         |                      |                             |                                |                 |                     |                     |                           |                 |                       |              |        |       |                             |                               |
| <i>P. falciparum</i> 3D7         |                         | PF3D7_1358000 SP TM     | PF3D7_0218600        | DUF3336, 2 TM               | PF3D7_0924000 DUF3336, 2 TM    | PF3D7_0209100   |                     |                     |                           |                 |                       |              |        |       |                             |                               |
| <i>P. berghei</i> ANKA           |                         | PBANKA_1134300 SP TM    | PBANKA_0315300 2 TM  | PBANKA_0824900 DUF3336, TM  | PBANKA_0306200                 |                 |                     |                     |                           |                 |                       |              |        |       |                             |                               |
| <i>P. knowlesi</i> H             |                         | PKNH_1113500 TM         | PKNH_0402300 2 TM    | PKNH_0722000 DUF3336, TM    | PKNH_0412000                   |                 |                     |                     |                           |                 |                       |              |        |       |                             |                               |
| <i>P. vivax</i> P01              |                         | PVP01_1113900 TM        | PVP01_0406400        | DUF3336, TM                 | PVP01_0415700                  |                 |                     |                     |                           |                 |                       |              |        |       |                             |                               |
| <i>P. yoelii</i> yoelii 17X      |                         | PY17X_1135800 SP TM     | PY17X_0315800 2 TM   | PY17X_0828200 DUF3336, TM   | PY17X_0306800                  |                 |                     |                     |                           |                 |                       |              |        |       |                             |                               |
| <b>Cryptosporidium</b>           |                         |                         |                      |                             |                                |                 |                     |                     |                           |                 |                       |              |        |       |                             |                               |
| <i>C. parvum</i> Iowa II         | Cgd8_3870 SP, TM        |                         |                      | cgd7_2630                   | cgd2_4050 SP, DUF3336, 3 TM    |                 | Cgd1_3610 SP, TM    | cgd8_4130 SP, TM    | Cpd7_3390 SP              | cgd8_3880 SP    |                       |              |        |       |                             |                               |
| <i>C. muris</i> RN66             | CMU_005760 SP           |                         |                      | CMU_034720                  | CMU_002900 SP, DUF3336, 3 TM   |                 | CMU_019990 SP       | CMU_005500 SP       | CMU_015650, CMU_023390 SP | CMU_005750 SP   |                       |              |        |       | CMU_015640 TM, no orthologs |                               |
| <i>C. hominis</i> UdeA01         | CHUDEA8_3870 SP         |                         |                      | CHUDEA7_2630                | CHUDEA2_4050 SP, DUF3336, 3 TM |                 | CHUDEA1_3610 SP, TM | CHUDEA8_4130 SP, TM | CHUDEA7_3390              | CHUDEA8_3880 SP |                       |              |        |       |                             |                               |
| <b>Hammondia</b>                 |                         |                         |                      |                             |                                |                 |                     |                     |                           |                 |                       |              |        |       |                             |                               |
| <i>H. hammondi</i> H.H.34        | HHA_232600              | HHA_231370 TM           | HHA_305140           | HHA_212130 DUF3336, 2 TM    | HHA_254420                     | HHA_273730      |                     |                     |                           |                 |                       |              |        |       |                             |                               |
| <b>Eimeria</b>                   |                         |                         |                      |                             |                                |                 |                     |                     |                           |                 |                       |              |        |       |                             |                               |
| <i>E. acervulina</i> Houghton    | EAH_00017960 SP         | EAH_00014460            |                      | EAH_00063930                |                                |                 |                     |                     |                           |                 |                       |              |        |       |                             | EAH_00023330 no orthologs     |
| <i>E. tenella</i> Houghton       |                         | ETH_000158335           |                      | ETH_00043390                | ETH_00013220 SP                | ETH_00022375    | ETH_00021090 TM     |                     |                           |                 |                       |              |        |       |                             | EAH_00028580 SP, no orthologs |
| <i>E. necatrix</i> Houghton      |                         | ENH_00076700            |                      | ENH_00047220 SP             |                                | ENH_00071370    | ENH_00082450        |                     |                           |                 |                       |              |        |       |                             | ENH_00036600                  |
| <i>E. maxima</i> Weybridge       |                         | EMWEY_00030960          |                      | EMWEY_00044720              | EMWEY_00032800                 | EMWEY_00041260  | EMWEY_00048650 TM   |                     |                           |                 |                       |              |        |       |                             | ENH_00054670 SP, TM           |
| <b>Neospora</b>                  |                         |                         |                      |                             |                                |                 |                     |                     |                           |                 |                       |              |        |       |                             |                               |
| <i>N. caninum</i> Liverpool      | NCLIV_032560            | NCLIV_031630 SP         |                      | NCLIV_049240 DUF3336, 2 TM  | NCLIV_008710                   | NCLIV_033980    |                     |                     |                           |                 |                       |              |        |       |                             |                               |
| <b>Sarcocystis</b>               |                         |                         |                      |                             |                                |                 |                     |                     |                           |                 |                       |              |        |       |                             |                               |
| <i>S. neurona</i> SO SH1         |                         | SRCN_2315 SP, 2 TM      |                      | SRCN_5319 2 TM              |                                |                 |                     |                     |                           |                 |                       |              |        |       |                             |                               |
| <i>S. neurona</i> SN3            |                         | SN3_01100885            |                      | SN3_01100200 DUF3336, 2 TM  |                                | SN3_00101735 SP |                     |                     |                           |                 |                       |              |        |       |                             | SN3_00301105 no orthologs     |
| <b>Cyclospora</b>                |                         |                         |                      |                             |                                |                 |                     |                     |                           |                 |                       |              |        |       |                             |                               |
| <i>C. cayetanensis</i> CHN_HEN01 | cyc_03366 SP            | cyc_07282 SP            | cyc_05125            | cyc_02282 DUF3336           | cyc_08887                      | cyc_07751       |                     |                     |                           |                 |                       |              |        |       |                             |                               |

**Table. S1.** Classification of Apicomplexan PLPs by ortholog group in *Toxoplasma*, *Plasmodium*, *Cryptosporidium*, *Hammondia*, *Eimeria*, *Neospora*, *Sarcocystis*, and *Cyclospora* represented by commonly studied species in each genus. The GeneID and name, if one has been assigned, is given along with any other annotated protein features for each PLP such as signal peptides (SP) or transmembrane domains (TM) under notes. The last column contains PLPs that did not fall into any ortholog groups. \*The *C. muris* genome contains two PLPs in the same ortholog group, but CMU\_015650 does not contain a SP and CMU\_023390 does.
